# Supplementary material for: Process Optimization for Production of Persimmon Wine with Lower Methanol
Source: MDPI journal article supplement (doi:10.3390/foods13050748), 2024-02-28
Supplement: s1 [file s1]

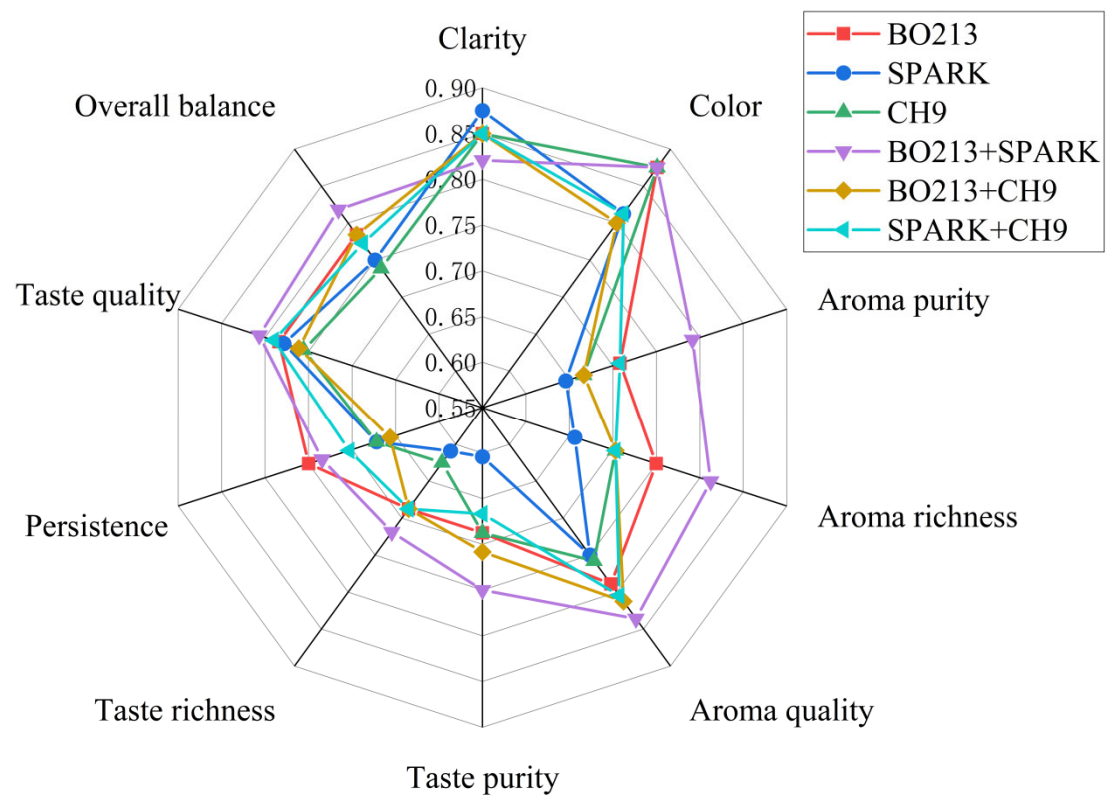

**Supplementary Figure S1** Sensory analysis of persimmon wines fermented with different starters.

**Supplementary Table S1** Volatile aromas in persimmon wine.

| Chemicals        | Retention<br>time<br>(min) | Area (%) | Contents(ug/L) |
|------------------|----------------------------|----------|----------------|
| Esters           |                            |          |                |
|                  |                            |          | 116280.5 ±     |
| Ethyl acetate    | 7.947                      | 20.41    | 6498.6         |
| Isobutyl acetate | 11.506                     | 0.13     | 79.3±5.5       |
| Ethyl butyrate   | 12.292                     | 0.02     | 58.7±1.8       |

|                      |        |      |              |
|----------------------|--------|------|--------------|
| Isoamyl acetate      | 15.323 | 2.93 | 319.0±24.2   |
| Methyl caproate      | 17.798 | 0.03 | 1.2±0.1      |
| Ethyl hexanoate      | 19.63  | 0.84 | 26.5±0.6     |
| Ethyl heptanoate     | 23.409 | 0.02 | 0.8±0.1      |
| Ethyl lactate        | 23.726 | 0.04 | 5025.2±162.2 |
| Methyl caprylate     | 25.469 | 0.1  | 3.3±0.2      |
| Ethyl caprylate      | 27.071 | 2.35 | 98.8±2.5     |
| Methyl caprate       | 32.511 | 0.03 | 1.0±0.1      |
| Ethyl caprate        | 33.855 | 0.91 | 41.3±0.3     |
| Ethyl 4- decenoate   | 35.37  | 0.03 | 0.9±0.0      |
| Ethyl phenylacetate  | 38.768 | 0.37 | 8.8±1.4      |
| Ethyl dodecanoate    | 39.221 | 0.08 | 3.1±0.4      |
| Phenyl propionate    | 40.368 | 0.05 | 2.0±0.4      |
| Isopropyl myristate  | 43.188 | 0.02 | 0.2±0.2      |
| Ethyl tetradecanoate | 43.484 | 0.02 | 0.6±0.1      |

Alcohols

|                        |        |       |                |
|------------------------|--------|-------|----------------|
| 2- methyl -1- propanol | 14.588 | 0.69  | 4139.7±419.6   |
| 3- methyl -1- butanol  | 18.769 | 11.58 | 38659.8±2996.0 |
| 1-Pentanol             | 20.302 | 0.03  | 74.1±12.1      |
| 3-Methylpentanol       | 22.86  | 0.02  | 0.4±0.0        |
| 5-Methyl-2-hexanol     | 23.166 | 0.01  | 0.5±0.0        |
| 1-Hexanol              | 24.094 | 0.05  | 1.7±0.0        |
| 2-Ethylhexyl alcohol   | 28.89  | 0.05  | 1.6±0.0        |
| 3-Ethyl-2-pentanol     | 30.552 | 1.08  | 42.5±8.9       |
| 1-Octanol              | 31.176 | 0.29  | 4.7±0.1        |
| 6-Methyl-1-octanol     | 31.453 | 0.02  | 0.8±0.2        |
| 2,3-Butanediol         | 31.693 | 0.13  | 33333.8±959.0  |
| 5-Methyl-1-hexanol     | 32.917 | 0.04  | 1.3±0.0        |
| 1-Nonanol              | 33.855 | 0.91  | 1.9±0.1        |
| 1-Decanol              | 37.192 | 0.41  | 14.4±0.8       |
| 2-Phenethyl alcohol    | 40.879 | 2.65  | 94.2±7.7       |
| 1-Dodecanol            | 41.778 | 2.27  | 79.4±4.5       |

|                         |        |      |           |
|-------------------------|--------|------|-----------|
| 1-Tetradecanol          | 45.977 | 0.02 | 0.8±0.1   |
| Aldehydes               |        |      |           |
| Nonanaldehyde           | 25.647 | 0.15 | 5.5±0.7   |
| Dodecanal               | 36.005 | 0.06 | 2±0.0     |
| 2,4-                    |        |      |           |
| Dimethylbenzaldehyde    | 38.902 | 0.09 | 3.3±0.3   |
| Alkane                  |        |      |           |
| 1,3,5-Trioxane          | 36.242 | 0.05 | 1.6±0.2   |
| Alkenes                 |        |      |           |
| Phenethylene            | 20.564 | 0.07 | 2.7±0.3   |
| Acids                   |        |      |           |
| Acetic acid             | 27.37  | 2.38 | 84.1±6.0  |
| Octanoic acid           | 43.846 | 1.18 | 189.1±6.2 |
| Nonanoic acid           | 46.403 | 0.25 | 9.1±1.1   |
| Ketones                 |        |      |           |
| 3- hydroxy -2- butanone | 21.744 | 0.03 | 1.0±0.1   |
| Nonyl methyl ketone     | 32.667 | 0.03 | 1.2±0.1   |

|                         |        |      |          |
|-------------------------|--------|------|----------|
| 2-Nonadecanone          | 35.826 | 0.02 | 0.6±0.0  |
| Methyl vinyl ketone     | 41.64  | 0.01 | 0.5±0.0  |
| Phenols                 |        |      |          |
| 2-Methoxy-4-            |        |      |          |
| vinylphenol             | 46.84  | 0.03 | 1.0±0.1  |
| 2,4-Di-tert-butylphenol | 49.137 | 0.3  | 11.0±1.3 |

---

The GC–MS analysis was performed as described by Li et al [1]. GC-MS-QP2020 (Shimadzu Corporation, Shanghai) was coupled in series with an olfactory detector OPV 275 (Shimadzu Corporation, Shanghai) and a DB-WAX capillary column (60 m × 0.25 mm × 0.25 µm; Agilent J&W, Santa Clara, CA, USA). The temperature of the GC column was kept as follows: 40°C for 3 min, increase to 160°C at a rate of 4 °C/min, followed by an increase to 220°C at a rate of 7°C/min, and then kept for 10 min. Electron ionization mass spectrometric data were acquired within the mass range 35–350 m/z at 0.2 s intervals combined with the selected ion monitoring mode for quantitative analysis. Aroma compounds were identified by comparing retention times, retention indexes, aroma characteristics, and mass spectra with those of standards available in the NIST 17.0 mass spectral library. The concentration of aroma compounds was quantitated by interpolating the relative area of the sample versus the area of the internal standard using calibration curves previously established for pure standards.

Compounds of chromatographical purity from Sigma-Aldrich (Shanghai, China), including aroma compounds such as ethyl acetate, isobutyl acetate, isoamyl acetate, hexyl acetate, ethyl butyrate, ethyl octanoate, n-pentyl acetate, and 2-octanol, were used as an external standard for identification and quantitation of aroma compounds in persimmon wine.

1. Li, N.; Wang, L.; Yin, J.; Ma, N.; Tao, Y. Adjustment of impact odorants in Hutai-8 rose wine by co-fermentation of *Pichia fermentans* and *Saccharomyces cerevisiae*. *Food Res. Int.* 2022, 153: 110959.
